# Supplementary material for: Design of fluorine-substituted high-entropy phosphates as cathode materials towards high-performance Na-ion batteries
Source: Royal Society of Chemistry journal article supplement (doi:10.1039/d4qi00561a), 2024-01-01
Supplement: d4qi00561a1.pdf [file d4qi00561a1.pdf]

## Supporting Information

### **Design of fluorine substituted high-entropy phosphates as cathode materials towards high-performance Na-ion batteries**

Qi Wang <sup>a</sup>, Man Zhao <sup>a</sup>, Hai-tao Yu <sup>a</sup>, Ying Xie <sup>a,b,\*</sup>, Ting-Feng Yi <sup>b,c,\*</sup>

<sup>a</sup> *Key Laboratory of Functional Inorganic Material Chemistry, Ministry of Education, School of Chemistry and Materials Science, Heilongjiang University, Harbin, 150080, PR China*

<sup>b</sup> *Key Laboratory of Dielectric and Electrolyte Functional Material Hebei Province, School of Resources and Materials, Northeastern University at Qinhuangdao, Qinhuangdao 066004, PR China*

<sup>c</sup> *School of Materials Science and Engineering, Northeastern University, Shenyang, 110819, PR China*

\*Corresponding author: Ying Xie

E-mail: xieying@hlju.edu.cn (Dr. Ying Xie).

\*Corresponding author: Ting-feng Yi

E-mail: tfyihit@163.com

## 1. Material characterisation

The crystal structures of the samples were analysed by X-ray powder diffractometer (XRD, Bruker D8, Cu-K $\alpha$ ,  $\lambda = 1.54056\text{\AA}$ ) in the range of 10-80° (2 $\theta$ ). Sample morphology and microstructure were observed using a scanning electron microscope (SEM, Hitachi S-800) and a transmission electron microscope (TEM, JEOL-2100). Electron diffraction images were obtained by fast Fourier transform (FFT). Chemical bonds were analysed using a Fourier infrared absorption spectrometer (FT-IR, Thermo Scientific Nicolet iS10). And particle size was determined using a particle size analyser (Nano-ZS90, Malvern). Elemental distribution was determined using an energy spectrometer (EDS, Oxford INCA, British). X-ray photoelectron spectroscopy (XPS) was performed using an ESCA Lab 250 system.

## 2. Electrochemical characterisation

The electrochemical tests of the prepared samples were all carried out in a half-cell, where the active material, conductive carbon black and polyvinylidene fluoride were mixed in a mass ratio of 8:1:1 and dissolved in N-methyl -2-pyrrolidone (NMP) to form a slurry. This slurry was uniformly coated on aluminum foil and dried in a vacuum oven at 110 °C for 11 h. Circular electrode sheets with a diameter of 14 mm were prepared, and the loading of active material on each electrode was in the range of 1.2-1.4 mg·cm<sup>-2</sup>. Sodium metal was chosen as the anode material, and glass fiber filters (Whatman) were used as the septum. The electrolyte consisted of 1 M NaClO<sub>4</sub>, propylene carbonate (PC) and 5 vol% solution of fluoroethylene carbonate (FEC). The final assembly of the

CR2025 button cell was carried out in a glove box filled with argon gas. The tests were carried out at room temperature ( $\approx 25\text{ }^{\circ}\text{C}$ ) and the electrochemical performance of the half-cells was tested at different current densities using a CT-4008 T system in the voltage range of 1.5-4.5 V. The electrochemical performance of the half-cells was measured using a CT-4008 T system. Cyclic voltammetry (CV) tests were performed at different scan rates using a CHI1000C electrochemical workstation. Electrochemical impedance spectroscopy (EIS) tests were performed using a Princeton P4000 electrochemical work in the frequency range of 0.01 Hz-100 kHz with a constant potential signal amplitude of 5 mV.

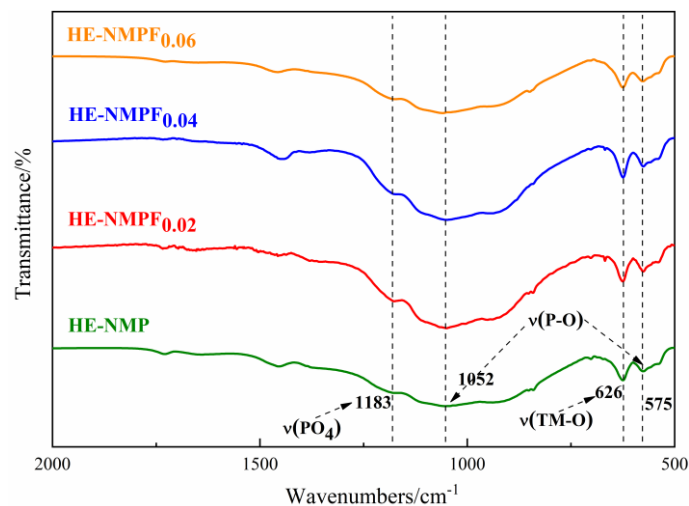

**Fig. S1** Fourier transform infrared (FT-IR) spectrum of the different samples.

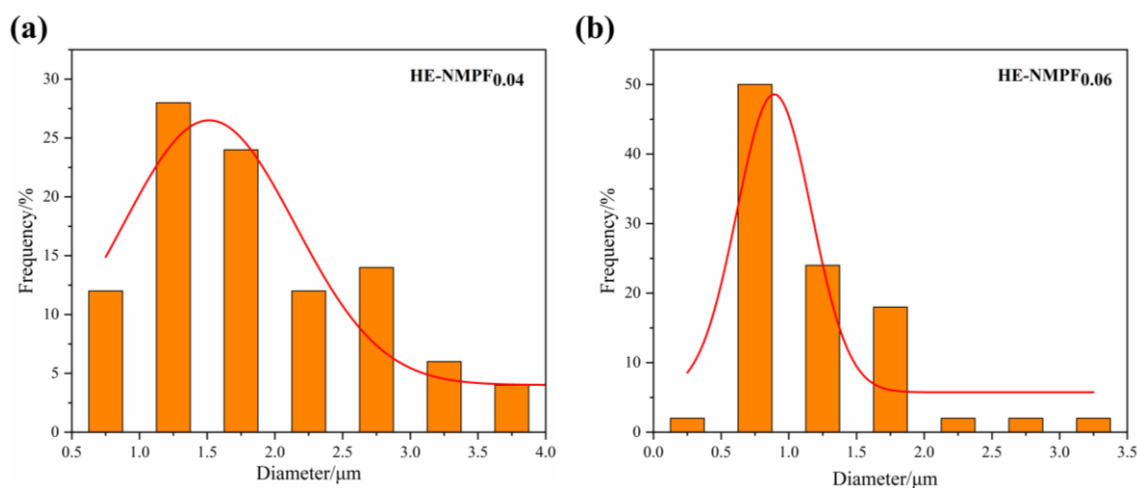

**Fig. S2** Particle size distribution histogram of (a) HE-NMPF<sub>0.04</sub> and (b) HE-NMPF<sub>0.06</sub>.

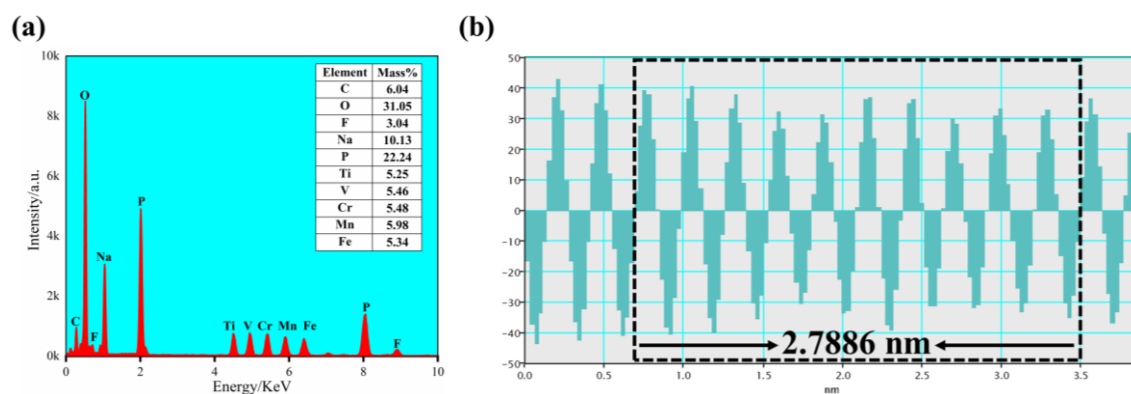

**Fig. S3** (a) Energy Dispersive Spectroscopy (EDS) pattern and (b) the contrast curves indicate the interplanar space of the HE-NMPF<sub>0.02</sub>.

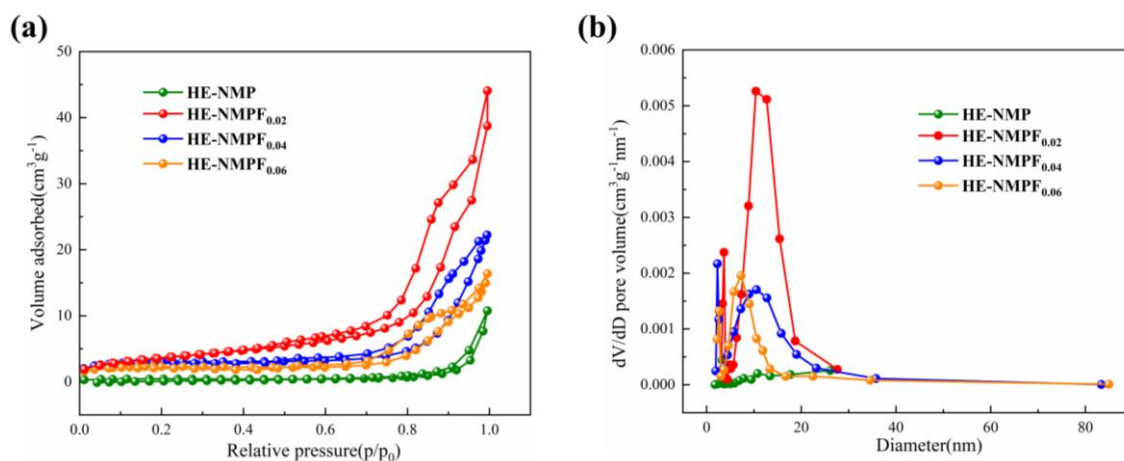

**Fig. S4** (a) N<sub>2</sub> adsorption-desorption isotherms and (b) pore size distributions of different samples.

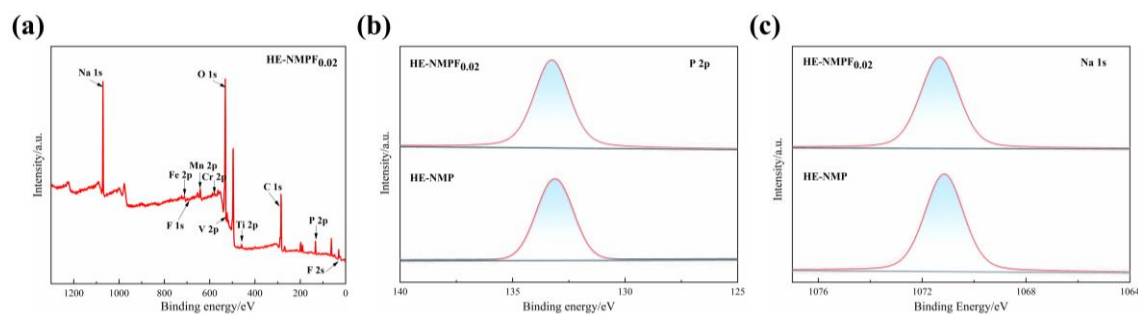

**Fig. S5** (a) XPS full spectrum of the HE-NMPF<sub>0.02</sub>, (b) P 2p, (c) Na 1s XPS spectra of HE-NMP and HE-NMPF<sub>0.02</sub>.

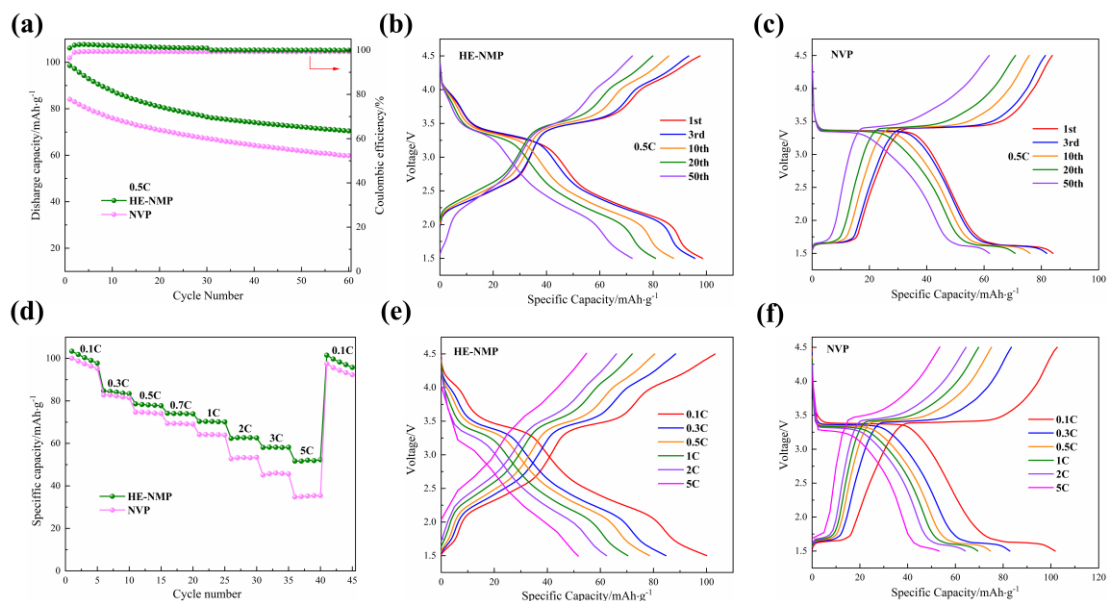

**Fig. S6** (a) Cycling performance of different samples; Charge/discharge curves of (b) HE-NMP and (c) NVP at 0.5 C; (d) Rate performance; Charge/discharge curves of (e) HE-NMP and (f) NVP at different current density.

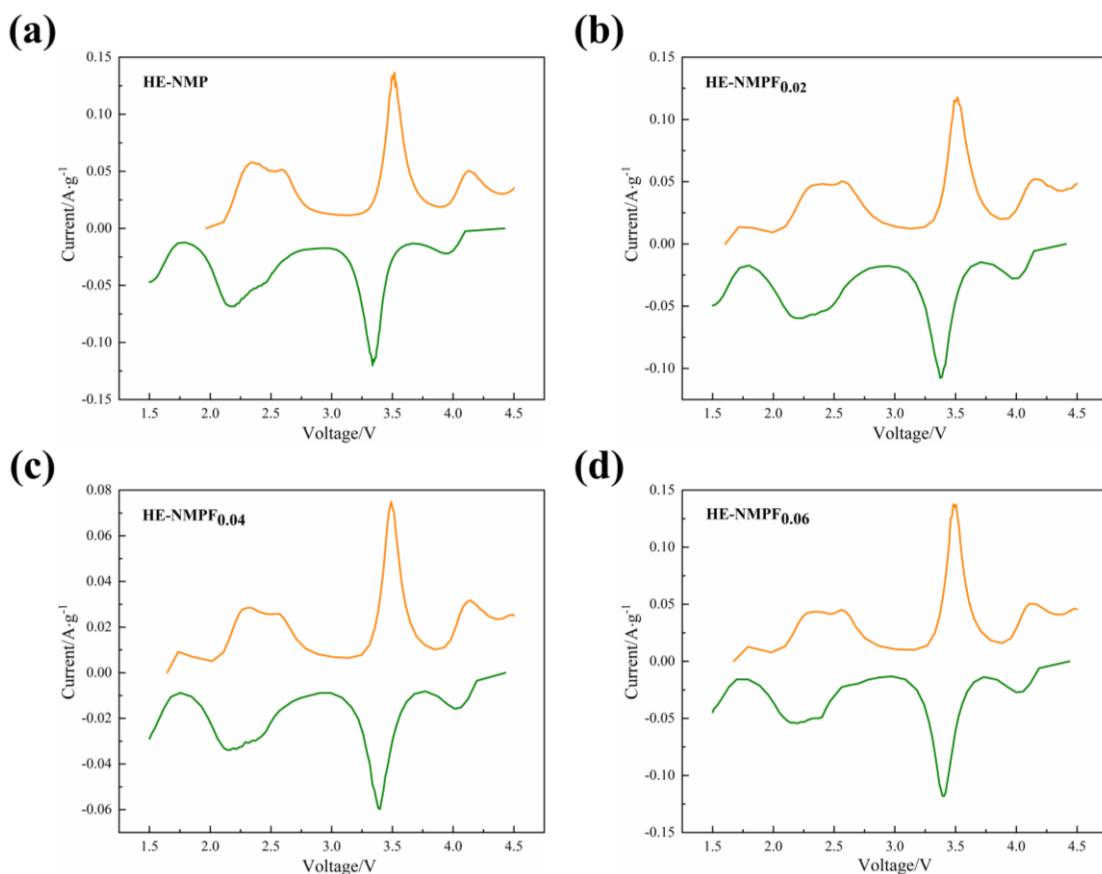

**Fig. S7** Corresponded  $dQ/dV$  curves of (a) HE-NMP, (b) HE-NMPF<sub>0.02</sub>, (c) HE-NMPF<sub>0.04</sub> and (d) HE-NMPF<sub>0.06</sub>.

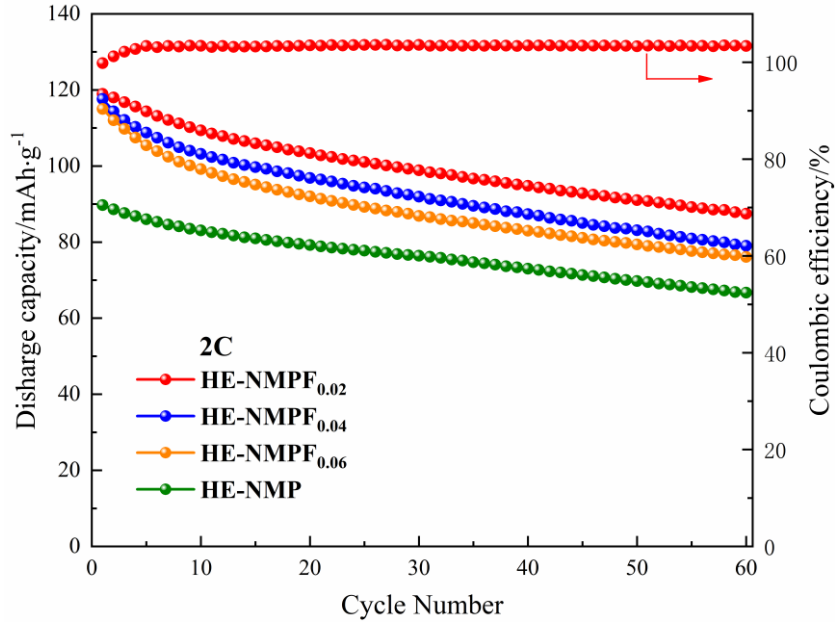

Fig. S8 Cycling performance at 2 C.

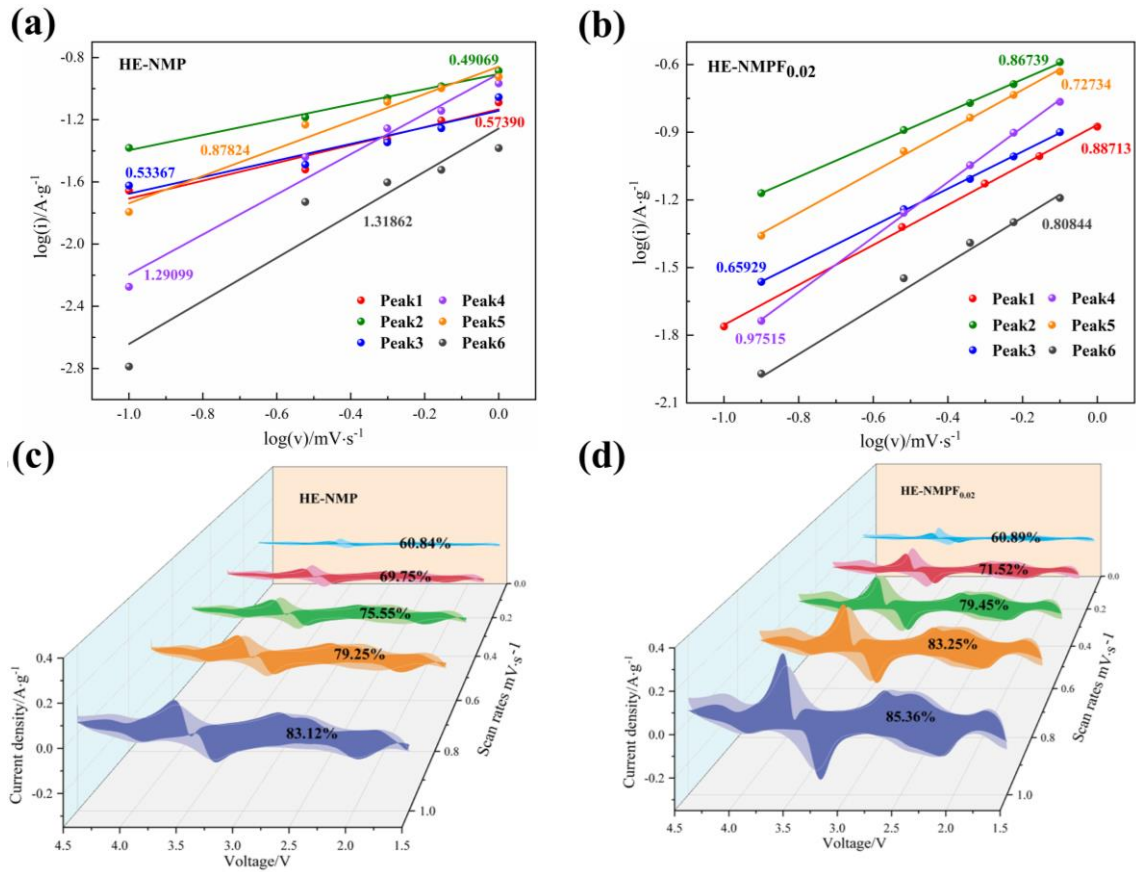

Fig. S9 (a, b) The  $\log(i_p)$  versus  $\log(v)$  curves and  $b$  values under different redox reactions;

(c, d) Pseudocapacitance contribution percentage under different scan rates.

**Table S1** Lattice parameters of all samples.

| Sample                  | Lattice<br>parameter a[Å] | Lattice<br>parameter b[Å] | Lattice<br>parameter c[Å] | Cell<br>volume[Å <sup>3</sup> ] |
|-------------------------|---------------------------|---------------------------|---------------------------|---------------------------------|
| HE-NMP                  | 8.71868                   | 8.71868                   | 21.81623                  | 1658.37                         |
| HE-NMPF <sub>0.02</sub> | 8.73557                   | 8.73557                   | 21.79696                  | 1663.33                         |
| HE-NMPF <sub>0.04</sub> | 8.73545                   | 8.73545                   | 21.80180                  | 1663.65                         |
| HE-NMPF <sub>0.06</sub> | 8.73528                   | 8.73528                   | 21.79744                  | 1663.26                         |



**Table S2** Refined structure information of the HE-NMPF<sub>0.02</sub>.

---

Crystal phase: trigonal, R-3c(S.G.); a=8.7355 Å, c=21.7970 Å, V=1663.33 Å<sup>3</sup>

---

| Atom | x        | y       | z        | Occ.   | Uiso.   | Wyckoff.<br>Position |
|------|----------|---------|----------|--------|---------|----------------------|
| O1   | 0.15007  | 0.48239 | 0.07526  | 0.9983 | 0.03015 | 36f                  |
| O2   | 0.54815  | 0.83570 | -0.02560 | 0.9983 | 0.03962 | 36f                  |
| P    | -0.03376 | 0.33333 | 0.08333  | 0.9983 | 0.02238 | 18e                  |
| Na1  | 0.33333  | 0.66667 | 0.16667  | 1.2540 | 0.02862 | 6b                   |
| Na2  | 0.66667  | 0.98692 | 0.08333  | 0.7150 | 0.02894 | 18e                  |
| Mn   | 0.33333  | 0.66667 | 0.01799  | 0.1972 | 0.02062 | 12c                  |
| Fe   | 0.33333  | 0.66667 | 0.01799  | 0.1975 | 0.02062 | 12c                  |
| V    | 0.33333  | 0.66667 | 0.01799  | 0.2032 | 0.02062 | 12c                  |
| Ti   | 0.33333  | 0.66667 | 0.01799  | 0.2034 | 0.02062 | 12c                  |
| Cr   | 0.33333  | 0.66667 | 0.01799  | 0.1987 | 0.02062 | 12c                  |
| F1   | 0.15007  | 0.48239 | 0.07526  | 0.0017 | 0.03015 | 36f                  |
| F2   | 0.54815  | 0.83570 | -0.02560 | 0.0017 | 0.03962 | 36f                  |

---

**Table S3** Energy dispersive spectroscopy (EDS) and inductively coupled plasma-optical emission spectroscopy (ICP-OES) data for HE-NMPF<sub>0.02</sub>.

| Element | EDS (Mass%) | ICP (Mass%) |
|---------|-------------|-------------|
| Fe      | 5.34        | 4.14        |
| Mn      | 5.98        | 4.17        |
| V       | 5.46        | 3.97        |
| Cr      | 5.48        | 4.01        |
| Ti      | 5.25        | 3.91        |
| F       | 3.04        | —           |

**Table S4** Specific surface area, total pore volume and average pore size of samples.

| Sample                  | Surface area (m <sup>2</sup> g <sup>-1</sup> ) | Pore volume (cm <sup>3</sup> g <sup>-1</sup> ) | Pore Size (nm) |
|-------------------------|------------------------------------------------|------------------------------------------------|----------------|
| HE-NMP                  | 1.6415                                         | 0.0118                                         | 13.8725        |
| HE-NMPF <sub>0.02</sub> | 13.2662                                        | 0.0602                                         | 18.6465        |
| HE-NMPF <sub>0.04</sub> | 10.4533                                        | 0.0290                                         | 17.4945        |
| HE-NMPF <sub>0.06</sub> | 7.9565                                         | 0.0214                                         | 16.1358        |

**Table S5** XPS peak positions of different orbitals for different elements.

|                             | 2p <sub>1/2</sub> (eV) |        |        | 2p <sub>3/2</sub> (eV) |        |        |
|-----------------------------|------------------------|--------|--------|------------------------|--------|--------|
|                             | +2                     | +3     | +4     | +2                     | +3     | +4     |
| HE-NMP-Fe                   | 724.81                 | 727.28 | -      | 711.68                 | 715.18 | -      |
| HE-NMPF <sub>0.02</sub> -Fe | 724.70                 | 727.01 | -      | 711.40                 | 715.02 | -      |
| HE-NMP-Mn                   | 653.28                 | -      | -      | 641.31                 | -      | -      |
| HE-NMPF <sub>0.02</sub> -Mn | 652.90                 | 654.45 | -      | 641.01                 | 642.41 | -      |
| HE-NMP-V                    | -                      | 523.68 | -      | -                      | 517.37 | -      |
| HE-NMPF <sub>0.02</sub> -V  | -                      | 523.35 | -      | -                      | 517.00 | -      |
| HE-NMP-Cr                   | -                      | 587.16 | -      | -                      | 577.84 | -      |
| HE-NMPF <sub>0.02</sub> -Cr | -                      | 587.41 | -      | -                      | 578.14 | -      |
| HE-NMP-Ti                   | -                      | 464.71 | 465.88 | -                      | 458.80 | 459.92 |
| HE-NMPF <sub>0.02</sub> -Ti | -                      | 464.98 | -      | -                      | 459.04 | -      |

**Table S6** Data for calculating the voltage platform difference ( $\Delta E$ ).

| Sample                  | charging | discharging | Voltage difference |
|-------------------------|----------|-------------|--------------------|
| HE-NMPF <sub>0.02</sub> | 3.52     | 2.52        | 1.00               |
| HE-NMPF <sub>0.04</sub> | 3.57     | 2.37        | 1.20               |
| HE-NMPF <sub>0.06</sub> | 3.74     | 2.31        | 1.43               |
| HE-NMP                  | 3.76     | 2.26        | 1.50               |

**Table S7** Comparison of the electrochemical performance for NASICON-type cathodes as reported in recent literature.

| Sample                                                                                                          | Current density/A·g <sup>-1</sup> | Cycle number | Specific capacity/mAh·g <sup>-1</sup> | Ref.         |
|-----------------------------------------------------------------------------------------------------------------|-----------------------------------|--------------|---------------------------------------|--------------|
| Na <sub>3</sub> MnTi(PO <sub>4</sub> ) <sub>3</sub>                                                             | 0.012                             | 100          | 60                                    | 1            |
| Na <sub>4</sub> MnCr(PO <sub>4</sub> ) <sub>3</sub>                                                             | 0.56                              | 600          | 47                                    | 2            |
| Na <sub>3</sub> MnTi(PO <sub>4</sub> ) <sub>3</sub>                                                             | 0.12                              | 800          | 75                                    | 3            |
| Na <sub>3</sub> V <sub>2</sub> (PO <sub>4</sub> ) <sub>2</sub> F <sub>2.5</sub> O <sub>2.5</sub>                | 0.24                              | 1000         | 75                                    | 4            |
| Na <sub>x</sub> VMn <sub>0.75</sub> Al <sub>0.25</sub> (PO <sub>4</sub> ) <sub>3</sub>                          | 0.12                              | 347          | 83                                    | 5            |
| Na <sub>4</sub> MnCr(PO <sub>4</sub> ) <sub>3</sub>                                                             | 1.0                               | 500          | 40                                    | 6            |
| Na <sub>2</sub> VTi(PO <sub>4</sub> ) <sub>3</sub> @C                                                           | 1.25                              | 500          | 73                                    | 7            |
| Na <sub>4</sub> MnV(PO <sub>4</sub> ) <sub>3</sub>                                                              | 2.2                               | 1000         | 54                                    | 8            |
| Na <sub>4</sub> Fe <sub>3</sub> (PO <sub>4</sub> ) <sub>2</sub> (P <sub>2</sub> O <sub>7</sub> )@C              | 2.4                               | 1000         | 50                                    | 9            |
| Na <sub>3</sub> Ti <sub>0.5</sub> V <sub>0.5</sub> (PO <sub>3</sub> ) <sub>3</sub> N                            | 1.6                               | 1000         | 53                                    | 10           |
| Na <sub>3</sub> V <sub>1.9</sub> (CaMgAlCrMn) <sub>0.01</sub> (PO <sub>4</sub> ) <sub>2</sub><br>F <sub>3</sub> | 2.6                               | 2000         | 80                                    | 11           |
| Na <sub>3</sub> V(AlFeInGaCr) <sub>0.2</sub> (PO <sub>4</sub> ) <sub>3</sub>                                    | 2.28                              | 5000         | 71                                    | 12           |
| Na <sub>3</sub> (TiVMnCrZr) <sub>0.4</sub> (PO <sub>4</sub> ) <sub>3</sub>                                      | 0.1                               | 100          | 33                                    | 13           |
| Na <sub>3.4</sub> (FeMnVCrTi) <sub>0.4</sub> (PO <sub>4</sub> ) <sub>3</sub>                                    | 0.75                              | 1000         | 77                                    | 14           |
| Na <sub>3.4</sub> (FeMnVCrTi) <sub>0.4</sub> (PO <sub>4</sub> ) <sub>2.98</sub> F <sub>0.02</sub>               | 3.0                               | 1000         | 62                                    | This<br>work |

**Table S8** Fitted EIS curve data and calculated  $D_{\text{Na}^+}$  data for the material.

| Sample                  | $R_s[\Omega]$ | $R_{ct}[\Omega]$ | $D_{\text{Na}^+} [\text{cm}^2 \text{s}^{-1}]$<br>[ $\times 10^{-12}$ ] |
|-------------------------|---------------|------------------|------------------------------------------------------------------------|
| HE-NMP                  | 4.73          | 274              | 0.33                                                                   |
| HE-NMPF <sub>0.02</sub> | 3.52          | 124              | 8.72                                                                   |
| HE-NMPF <sub>0.04</sub> | 4.30          | 206              | 3.33                                                                   |
| HE-NMPF <sub>0.06</sub> | 4.40          | 228              | 1.52                                                                   |

## Reference

1. H. Gao, Y. Li, K. Park and J. B. Goodenough, Sodium Extraction from NASICON-Structured  $\text{Na}_3\text{MnTi}(\text{PO}_4)_3$  through Mn(III)/Mn(II) and Mn(IV)/Mn(III) Redox Couples, *Chemistry of Materials*, 2016, **28**, 6553-6559.
2. J. Zhang, Y. Liu, X. Zhao, L. He, H. Liu, Y. Song, S. Sun, Q. Li, X. Xing and J. Chen, A Novel NASICON-Type  $\text{Na}_4\text{MnCr}(\text{PO}_4)_3$  Demonstrating the Energy Density Record of Phosphate Cathodes for Sodium-Ion Batteries, *Advanced Materials*, 2020, **32**, 1906348.
3. T. Zhu, P. Hu, C. Cai, Z. Liu, G. Hu, Q. Kuang, L. Mai and L. Zhou, Dual carbon decorated  $\text{Na}_3\text{MnTi}(\text{PO}_4)_3$ : A high-energy-density cathode material for sodium-ion batteries, *Nano Energy*, 2020, **70**, 2211-2855.
4. W. Li, Z. Yao, S. Zhang, X. Wang, X. Xia, C. Gu and J. Tu, High-performance  $\text{Na}_3\text{V}_2(\text{PO}_4)_2\text{F}_{2.5}\text{O}_{0.5}$  cathode: Hybrid reaction mechanism study via ex-situ XRD and sodium storage properties in solid-state batteries, *Chemical Engineering Journal*, 2021, **423**, 1385-8947.
5. S. Ghosh, N. Barman and P. Senguttuvan, Impact of  $\text{Mg}^{2+}$  and  $\text{Al}^{3+}$  Substitutions on the Structural and Electrochemical Properties of NASICON- $\text{Na}_x\text{VMn}_{0.75}\text{M}_{0.25}(\text{PO}_4)_3$  (M = Mg and Al) Cathodes for Sodium-Ion Batteries, *Small*, 2020, **16**, 2003973.
6. W. Zhang, H. Li, Z. Zhang, M. Xu, Y. Lai and S. L. Chou, Full Activation of  $\text{Mn}^{4+}/\text{Mn}^{3+}$  Redox in  $\text{Na}_4\text{MnCr}(\text{PO}_4)_3$  as a High-Voltage and High-Rate Cathode Material for Sodium-Ion Batteries, *Small*, 2020, **16**, 2001524.

7. D. Wang, X. Bie, Q. Fu, D. Dixon, N. Bramnik, Y.-S. Hu, F. Fauth, Y. Wei, H. Ehrenberg, G. Chen and F. Du, Sodium vanadium titanium phosphate electrode for symmetric sodium-ion batteries with high power and long lifespan, *Nature Communications*, 2017, **8**, 15888.
8. H. Li, T. Jin, X. Chen, Y. Lai, Z. Zhang, W. Bao and L. Jiao, Rational Architecture Design Enables Superior Na Storage in Greener NASICON- $\text{Na}_4\text{MnV}(\text{PO}_4)_3$  Cathode, *Advanced Energy Materials*, 2018, **8**, 1801418.
9. M. Chen, W. Hua, J. Xiao, D. Cortie, W. Chen, E. Wang, Z. Hu, Q. Gu, X. Wang, S. Indris, S.-L. Chou and S.-X. Dou, NASICON-type air-stable and all-temperature cathode for sodium-ion batteries with low cost and high-power density, *Nature Communications*, 2019, **10**, 1480.
10. M. Chen, J. Xiao, W. Hua, Z. Hu, W. Wang, Q. Gu, Y. Tang, S. L. Chou, H. K. Liu and S. X. Dou, A Cation and Anion Dual Doping Strategy for the Elevation of Titanium Redox Potential for High-Power Sodium-Ion Batteries, *Angewandte Chemie International Edition*, 2020, **59**, 12076-12083.
11. Z. Y. Gu, J. Z. Guo, J. M. Cao, X. T. Wang, X. X. Zhao, X. Y. Zheng, W. H. Li, Z. H. Sun, H. J. Liang and X. L. Wu, An Advanced High-Entropy Fluorophosphate Cathode for Sodium-Ion Batteries with Increased Working Voltage and Energy Density, *Advanced Materials*, 2022, **34**, 2110108.
12. M. Li, C. Sun, Q. Ni, Z. Sun, Y. Liu, Y. Li, L. Li, H. Jin and Y. Zhao, High Entropy Enabling the Reversible Redox Reaction of  $\text{V}^{4+}/\text{V}^{5+}$  Couple in NASICON-Type

- Sodium Ion Cathode, *Advanced Energy Materials*, 2023, **13**, 2203971.
13. B. Wu, G. Hou, E. Kovalska, V. Mazanek, P. Marvan, L. Liao, L. Dekanovsky, D. Sedmidubsky, I. Marek, C. Hervoche and Z. Sofer, High-Entropy NASICON Phosphates ( $\text{Na}_3\text{M}_2(\text{PO}_4)_3$  and  $\text{NaMPO}_4\text{O}_x$ , M = Ti, V, Mn, Cr, and Zr) for Sodium Electrochemistry, *Inorganic Chemistry*, 2022, **61**, 4092-4101.
14. H. Li, M. Xu, H. Long, J. Zheng, L. Zhang, S. Li, C. Guan, Y. Lai and Z. Zhang, Stabilization of Multicationic Redox Chemistry in Polyanionic Cathode by Increasing Entropy, *Advanced Science*, 2022, **9**, 2202082.
